# Supplementary material for: Identification of an H-Ras nanocluster disrupting peptide
Source: Springer Nature journal article supplement (doi:10.1038/s42003-024-06523-9), 2024-07-09
Supplement: MOESM2 [file 42003_2024_6523_MOESM2_ESM.pdf]

## Supplementary Information

### Identification of an H-Ras nanocluster disrupting peptide

Candy Laura Steffen <sup>1,\*</sup>, Ganesh babu Manoharan <sup>1,\*</sup>, Karolina Pavic <sup>1</sup>, Alejandro Yeste-Vázquez <sup>2,3</sup>, Matias Knuuttila <sup>4</sup>, Neha Arora <sup>5</sup>, Yong Zhou <sup>5</sup>, Harri Härmä <sup>6</sup>, Anthoula Gaigneaux <sup>7</sup>, Tom N. Grossmann <sup>2,3</sup>, Daniel Kwaku Abankwa <sup>1,4</sup>

<sup>1</sup> Cancer Cell Biology and Drug Discovery group, Department of Life Sciences and Medicine, University of Luxembourg, 4362 Esch-sur-Alzette, Luxembourg.

<sup>2</sup> Department of Chemistry and Pharmaceutical Sciences, VU University Amsterdam, Amsterdam, The Netherlands.

<sup>3</sup> Amsterdam Institute of Molecular and Life Sciences (AIMMS), VU University Amsterdam, Amsterdam, The Netherlands.

<sup>4</sup> Turku Bioscience Centre, University of Turku and Åbo Akademi University, 20520 Turku, Finland.

<sup>5</sup> Department of Integrative Biology and Pharmacology, McGovern Medical School, UT Health, Houston, TX 77030, USA.

<sup>6</sup> Chemistry of Drug Development, Department of Chemistry, University of Turku, 20500 Turku, Finland.

<sup>7</sup> Bioinformatics Core, Department of Life Sciences and Medicine, University of Luxembourg, 4367 Esch-sur-Alzette, Luxembourg

\* These authors contributed equally

Correspondence: daniel.abankwa@uni.lu

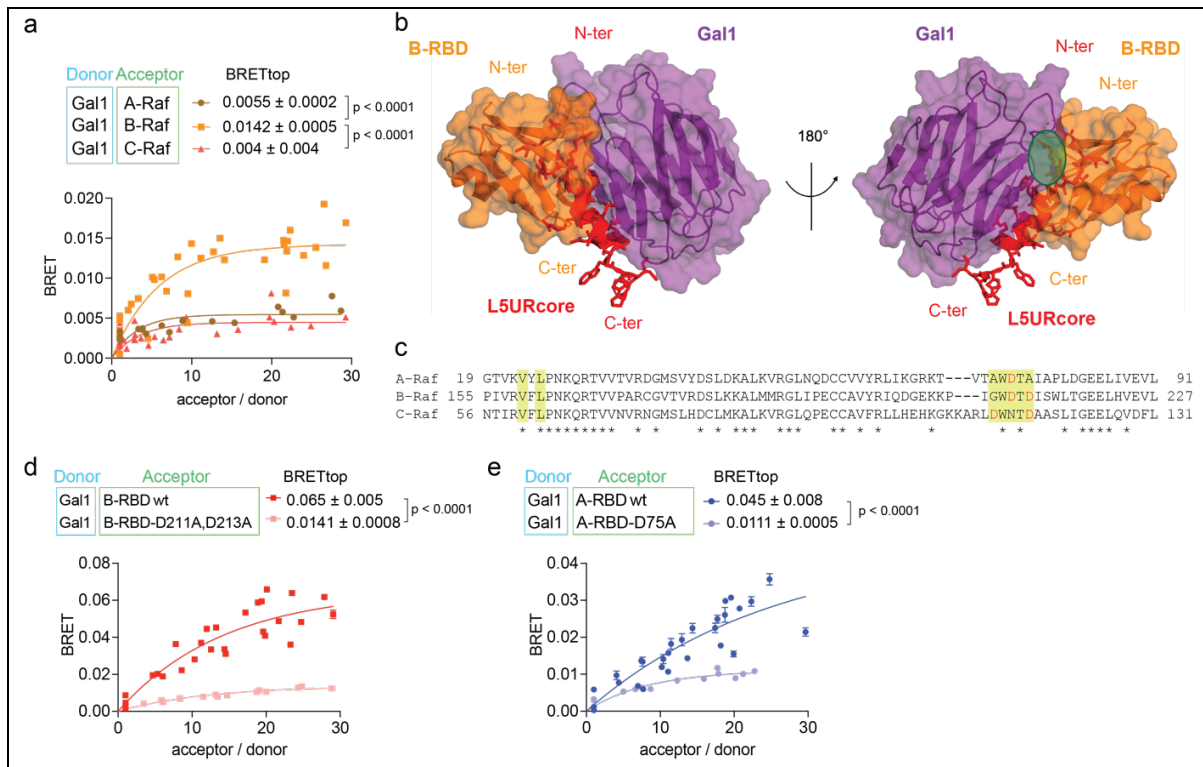

### Supplementary Figure 1. Related to main Figure 1.

(a) BRET-titration curves of Gal1 and full-length Raf proteins;  $n = 3$ .

(b) Computational model of hypothetical Gal1/B-RBD/L5UR (22-45) complex indicating the carbohydrate binding site of Gal1 (PDB ID 3W58) in green. The structural model was created with PyMOL Molecular Graphics System (Version 2.5.1) using the published Gal1/C-RBD docking model <sup>1</sup>, the Haddock model of Gal1/L5UR(22-45) <sup>2</sup> and the RBD structure of B-Raf (PDB ID 3NY5).

(c) Multiple sequence alignment of RBDs of A-, B- and C-Raf. The protein sequences of RBDs from the three human Raf proteins, A-Raf (P10398), B-Raf (P15056) and C-Raf (P04049) were essentially as employed in the cellular assays; in brackets Uniprot database (<http://uniprot.org/>) accession numbers. Multiple sequence alignment was performed using Clustal Omega (<https://www.ebi.ac.uk/Tools/msa/clustalo/>). Yellow highlighted residues were identified as possible interaction sites with Gal1 before <sup>1</sup>, and mutations tested in the BRET experiments in (d, e) are in red.

(d, e) BRET-titration curves of Gal1 with wild-type (wt) A-RBD and A-RBD-D75A mutant (d);  $n = 3$ , or with wt B-RBD and B-RBD-D211A, D213A mutant (e);  $n = 3$ .

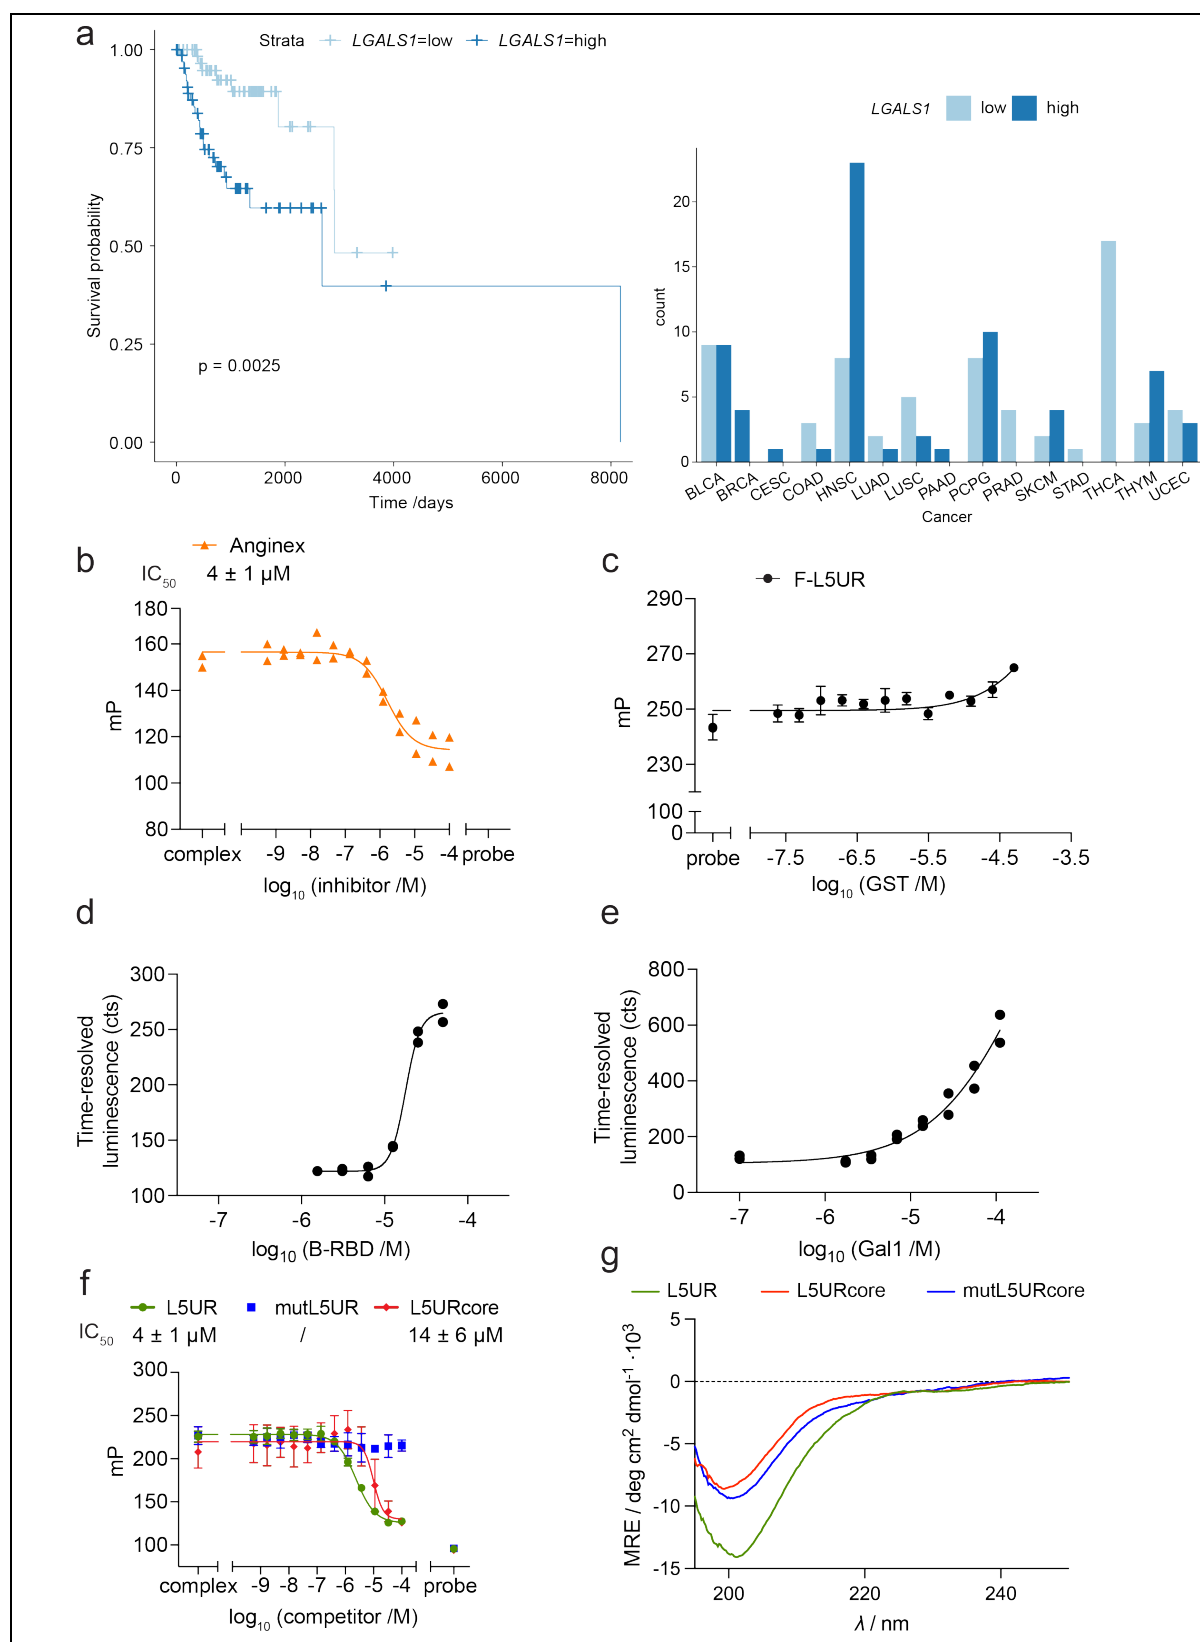

**Supplementary Figure 2. Related to main Figures 2 and 3.**

(a) PanCanAtlas data analysis reveals that high Gal1 (gene *LGALS1*) levels significantly decrease survival in HRAS mutant cancer cases (left). Higher Gal1 levels are more often found in head and neck (HNSC) cancers and to some extent in skin (SKCM) and thymus (THYM) cancers. These cancer types could therefore be particularly interesting for

treatment with a Gal1/ Raf-interface inhibitor, which would abrogate the stimulating effect of Gal1 on oncogenic H-Ras nanoclustering and thus MAPK-signalling.

**(b)** Displacement of F-L5UR (5 nM) from Gal1 (5  $\mu$ M) by Anginex; n = 2.

**(c)** Control showing negligible binding of 10 nM F-L5UR to GST measured by fluorescence polarization; n = 3.

**(d)** Eu-L5URcore (29 nM) binding to B-RBD measured in the QRET assay using time-resolved luminescence detection; n = 2.

**(e)** Eu-L5URcore (29 nM) binding to Gal1 measured in the QRET assay using time-resolved luminescence detection; n = 2.

**(f)** Displacement of F-L5UR (5 nM) from C-RBD (200 nM) by L5UR-derived peptides; n = 3.

**(g)** Circular dichroism spectra of 25  $\mu$ M of indicated L5UR-derived peptides in 1x PBS (pH 7.5).



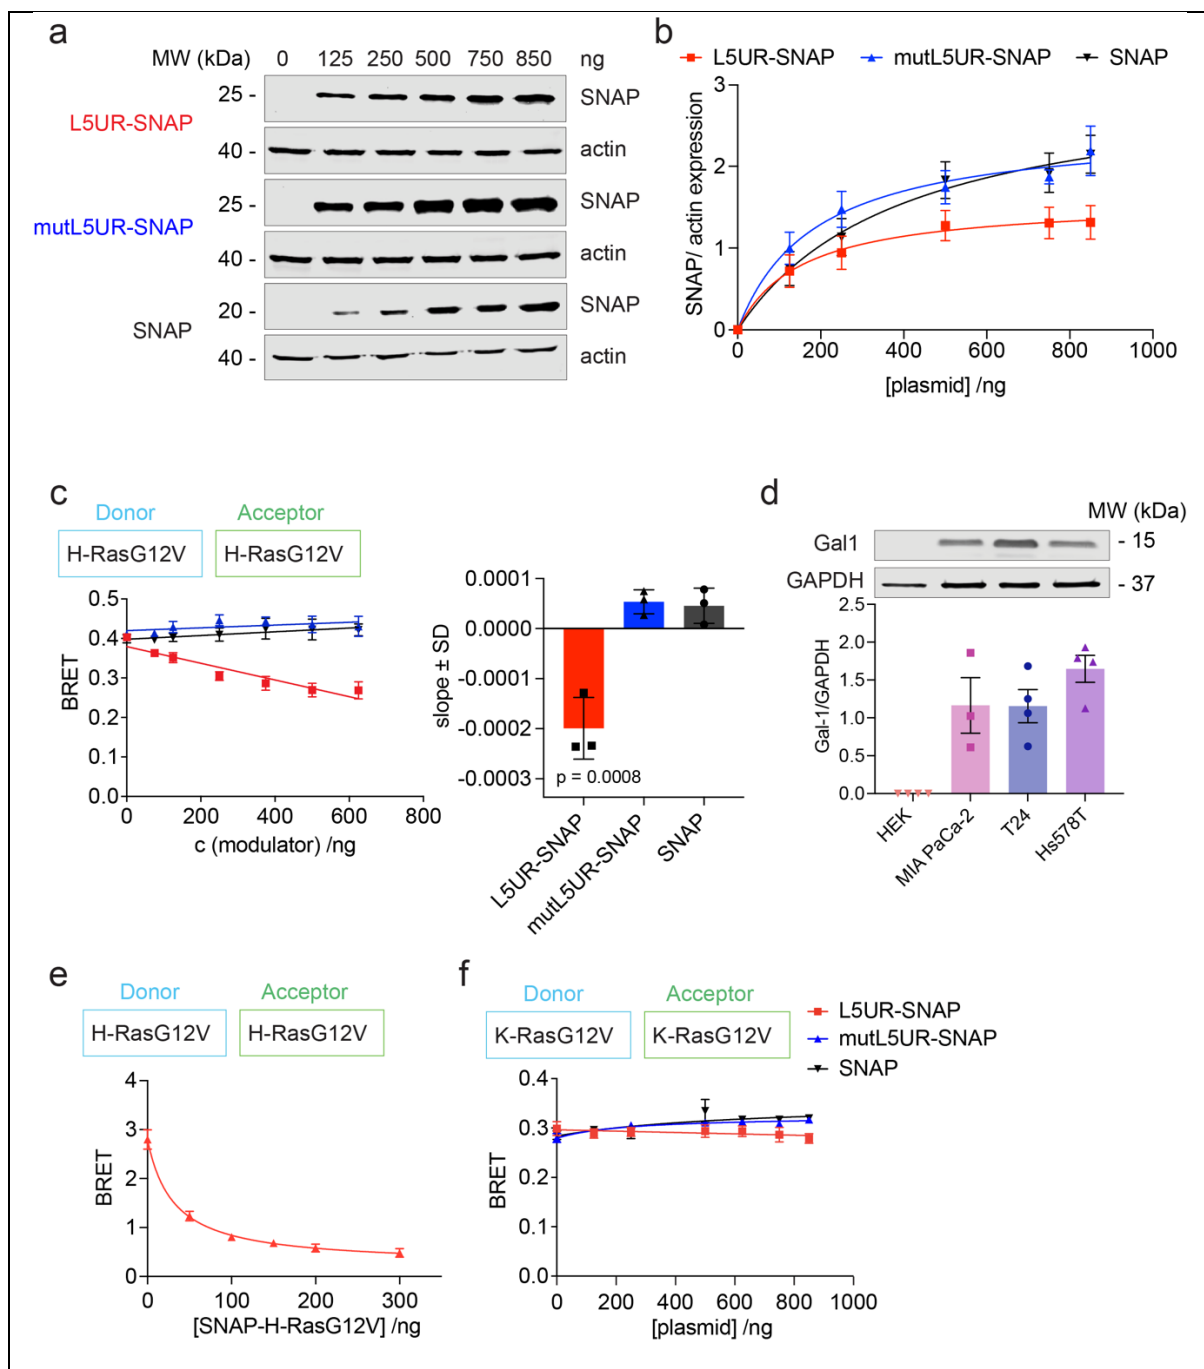

**Supplementary Figure 3. Related to main Figures 3, 4 and 5.**

(a, b) Representative immunoblots (c) and quantification of all repeats (d) showing dose-dependent expression of L5UR constructs (48 h); n = 3.

(c) Effect of L5UR construct expression (48 h) on H-RasG12V nanoclustering-BRET (donor:acceptor plasmid ratio = 1:5); n = 3.

(d) Immunoblot data and quantification of endogenous Gal1 expression in employed cell lines; n = 3.

(e) Effect of SNAP-H-RasG12V on NanoLuc/ mNeonGreen-H-RasG12V nanoclustering-BRET (donor:acceptor plasmid ratio = 1:5); n = 3.

(f) Negligible effect of L5UR construct expression (48 h) on K-RasG12V nanoclustering-BRET (donor:acceptor plasmid ratio = 1:10); n = 3.



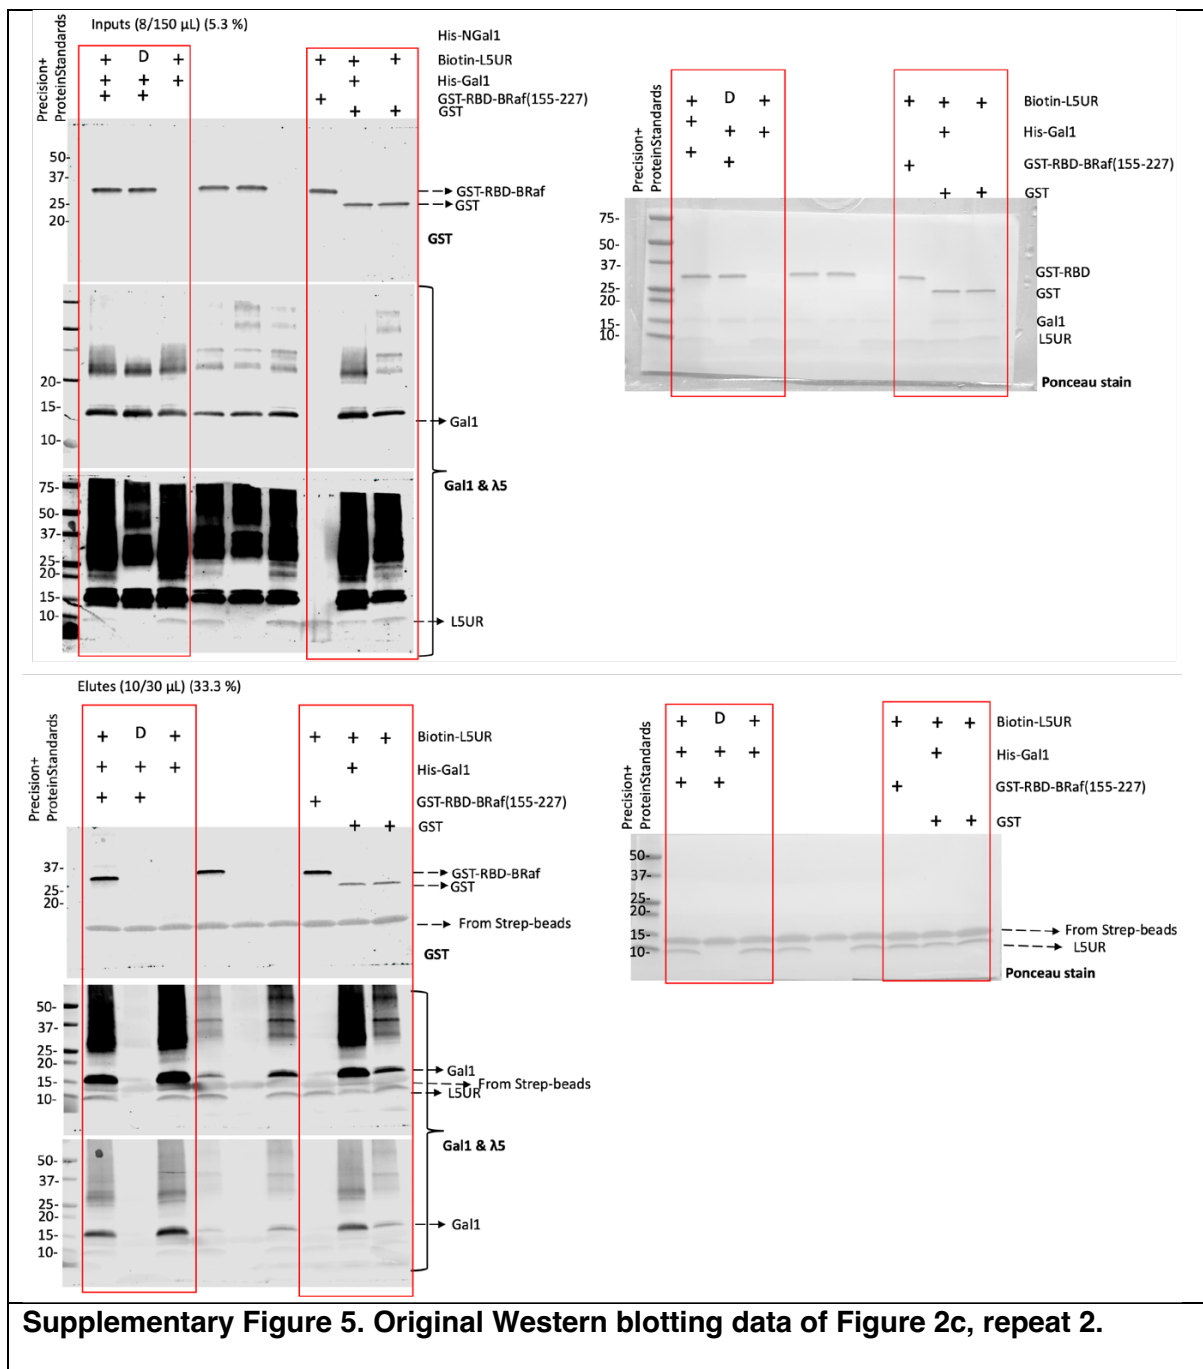



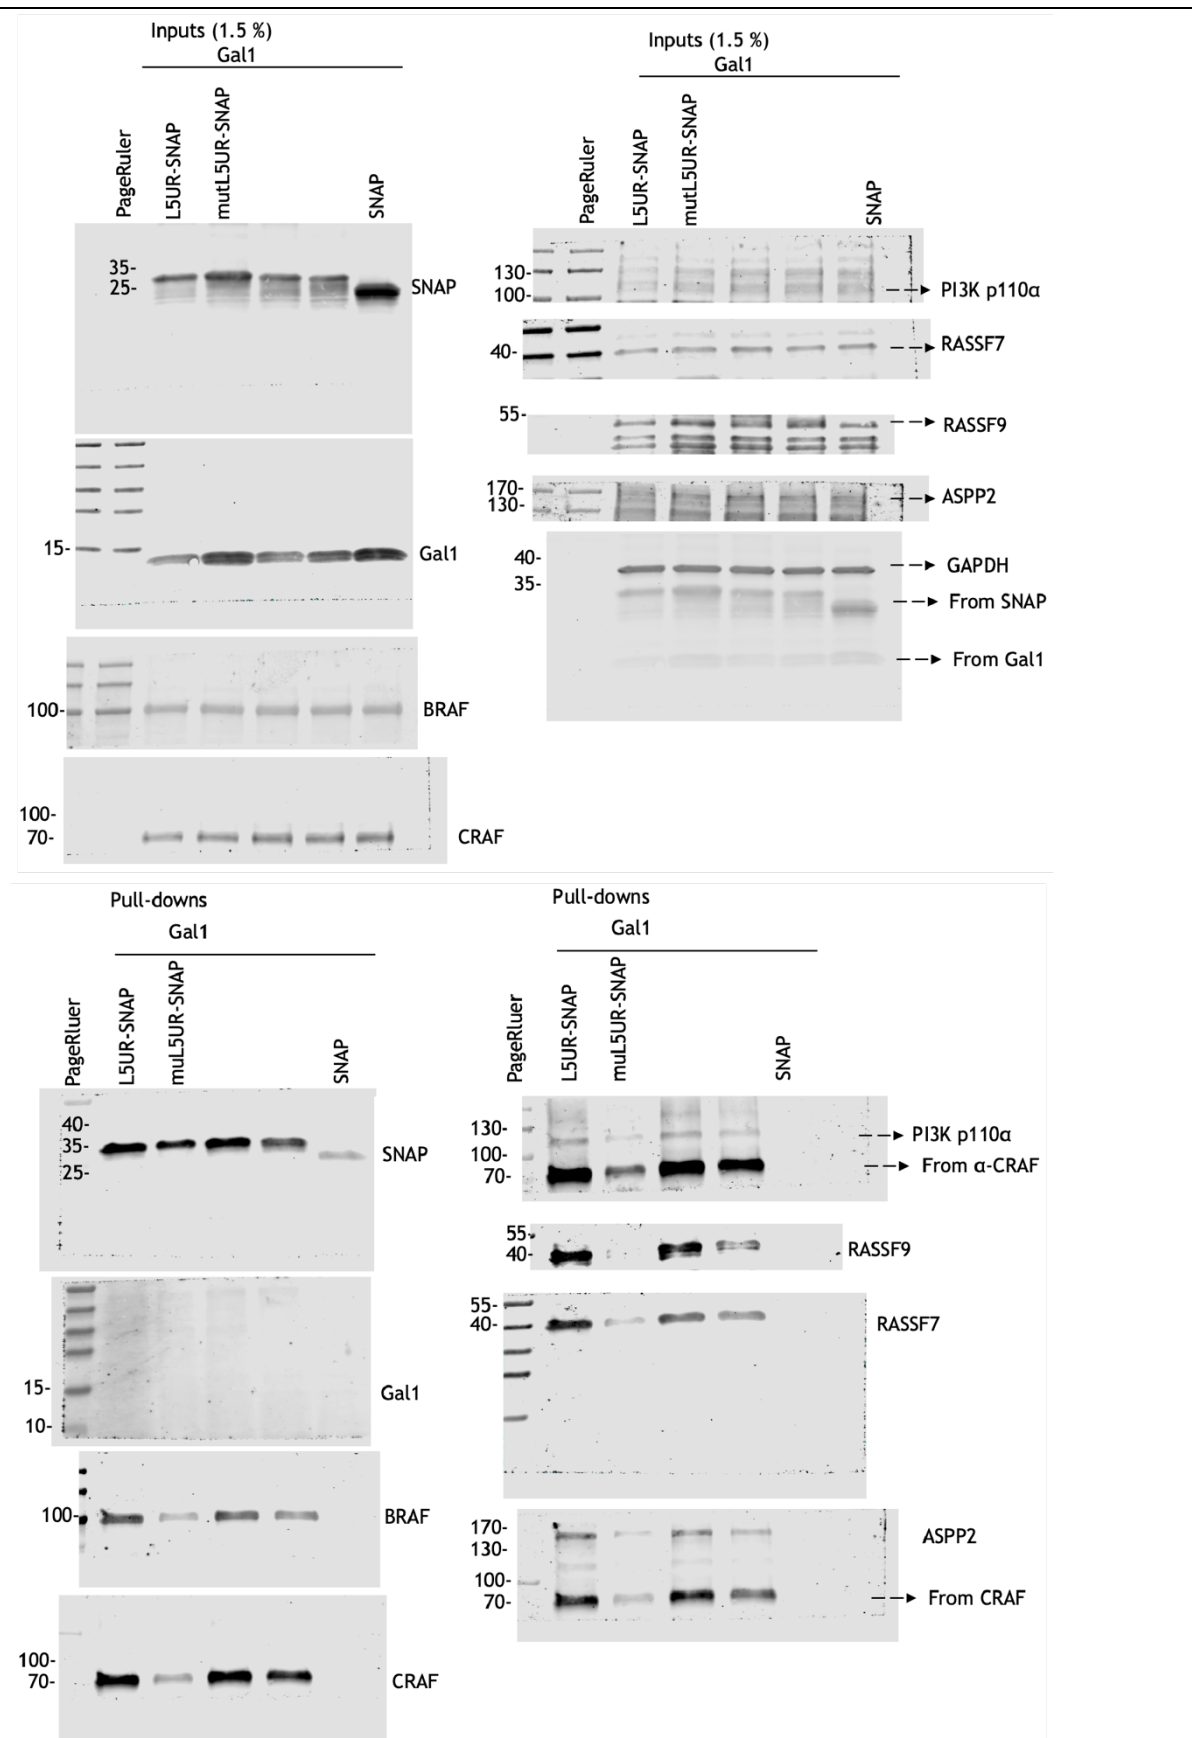

**Supplementary Figure 7. Original Western blotting data of Figure 3e.**

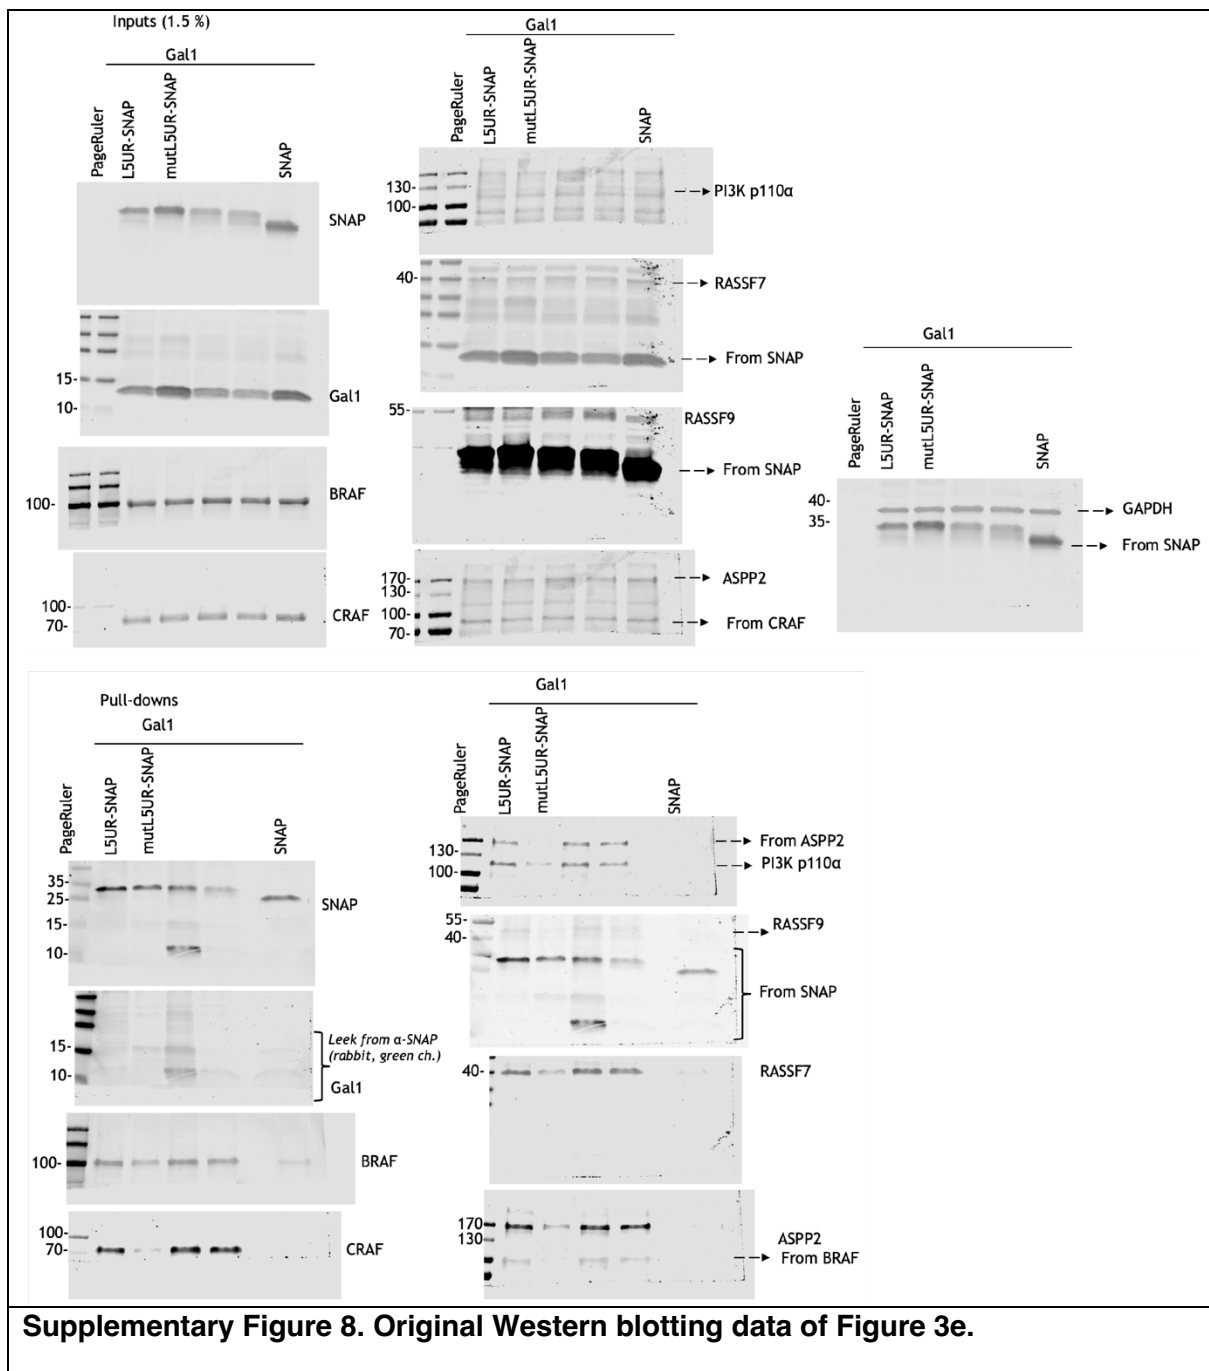

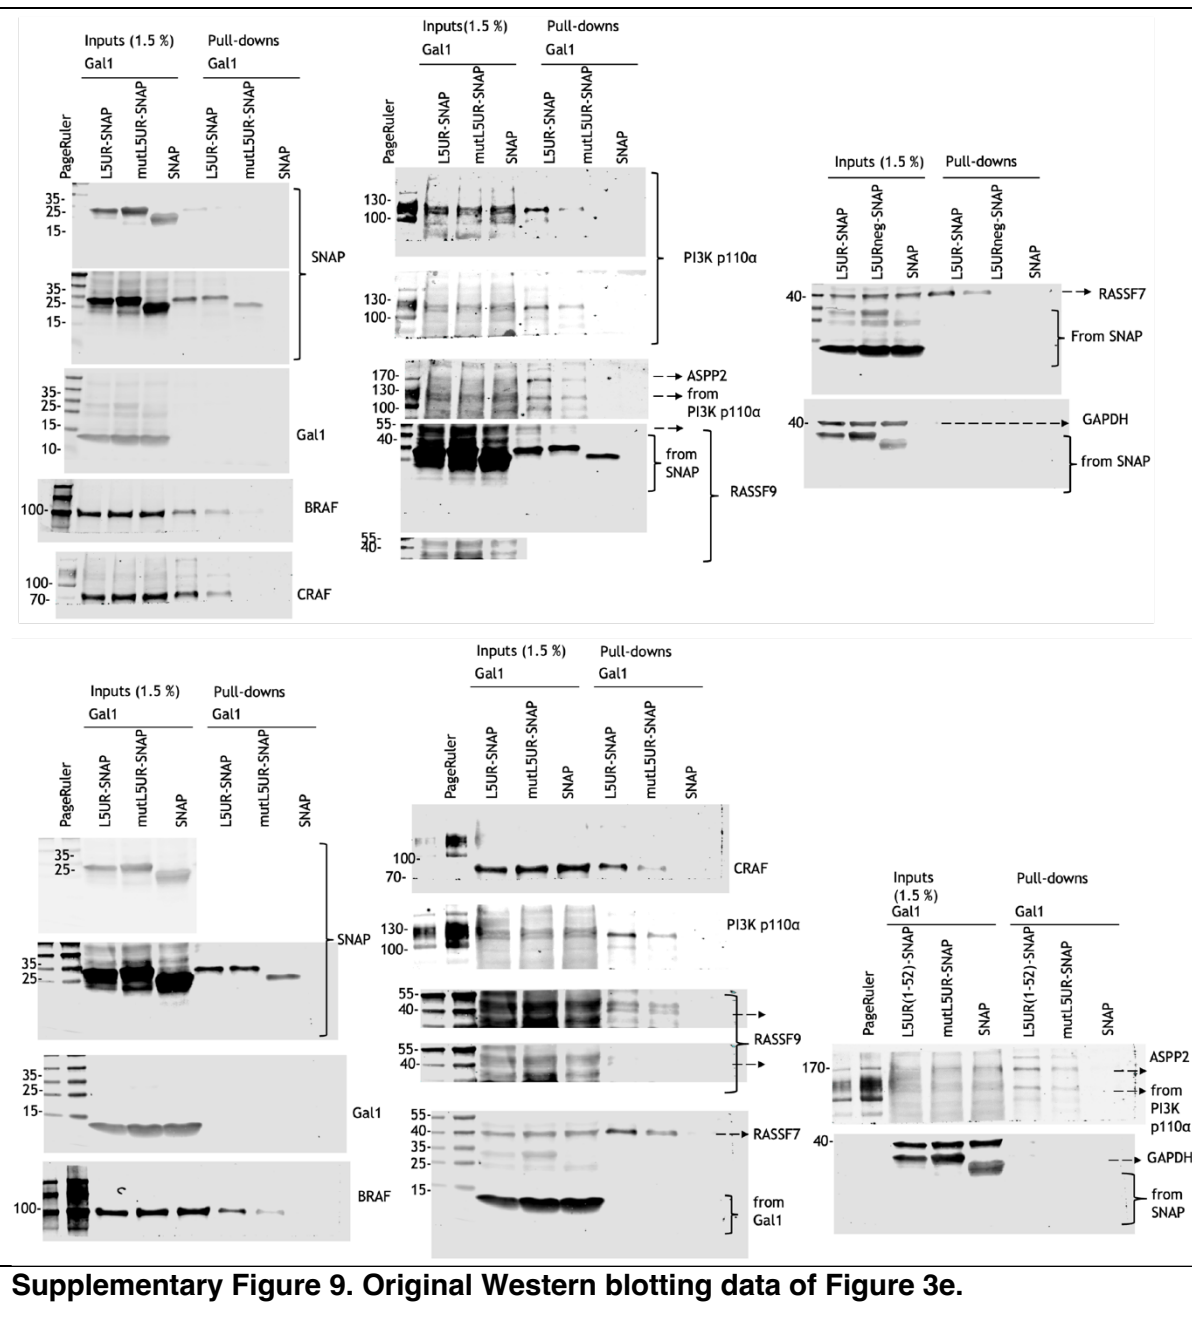

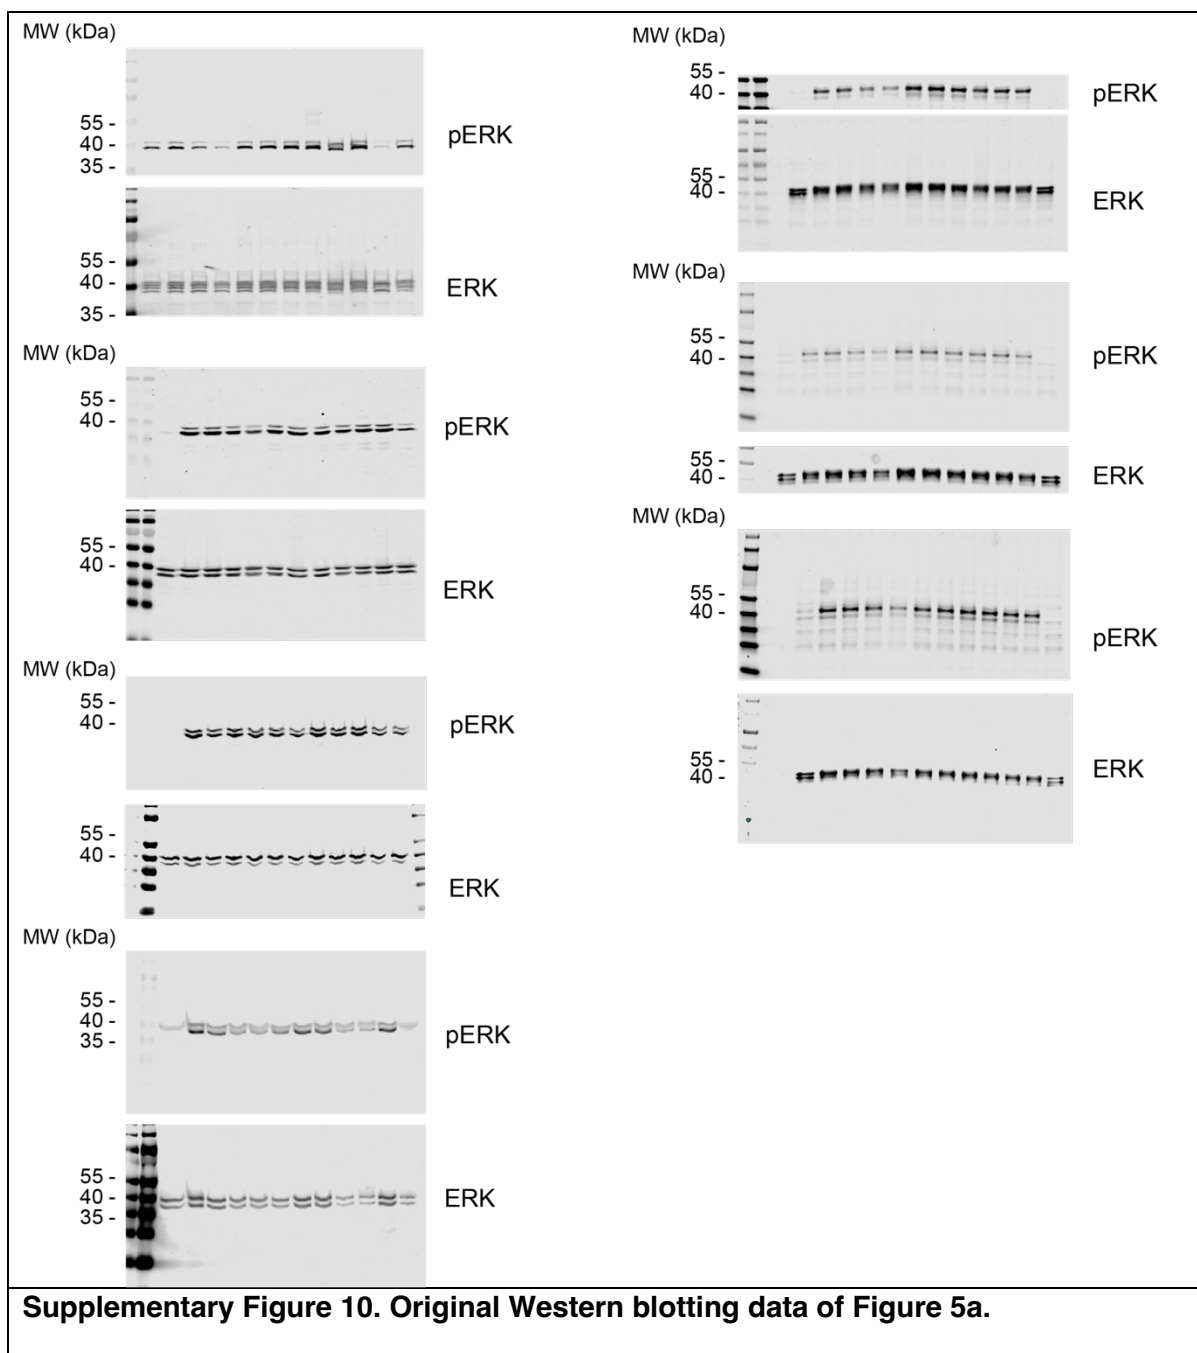



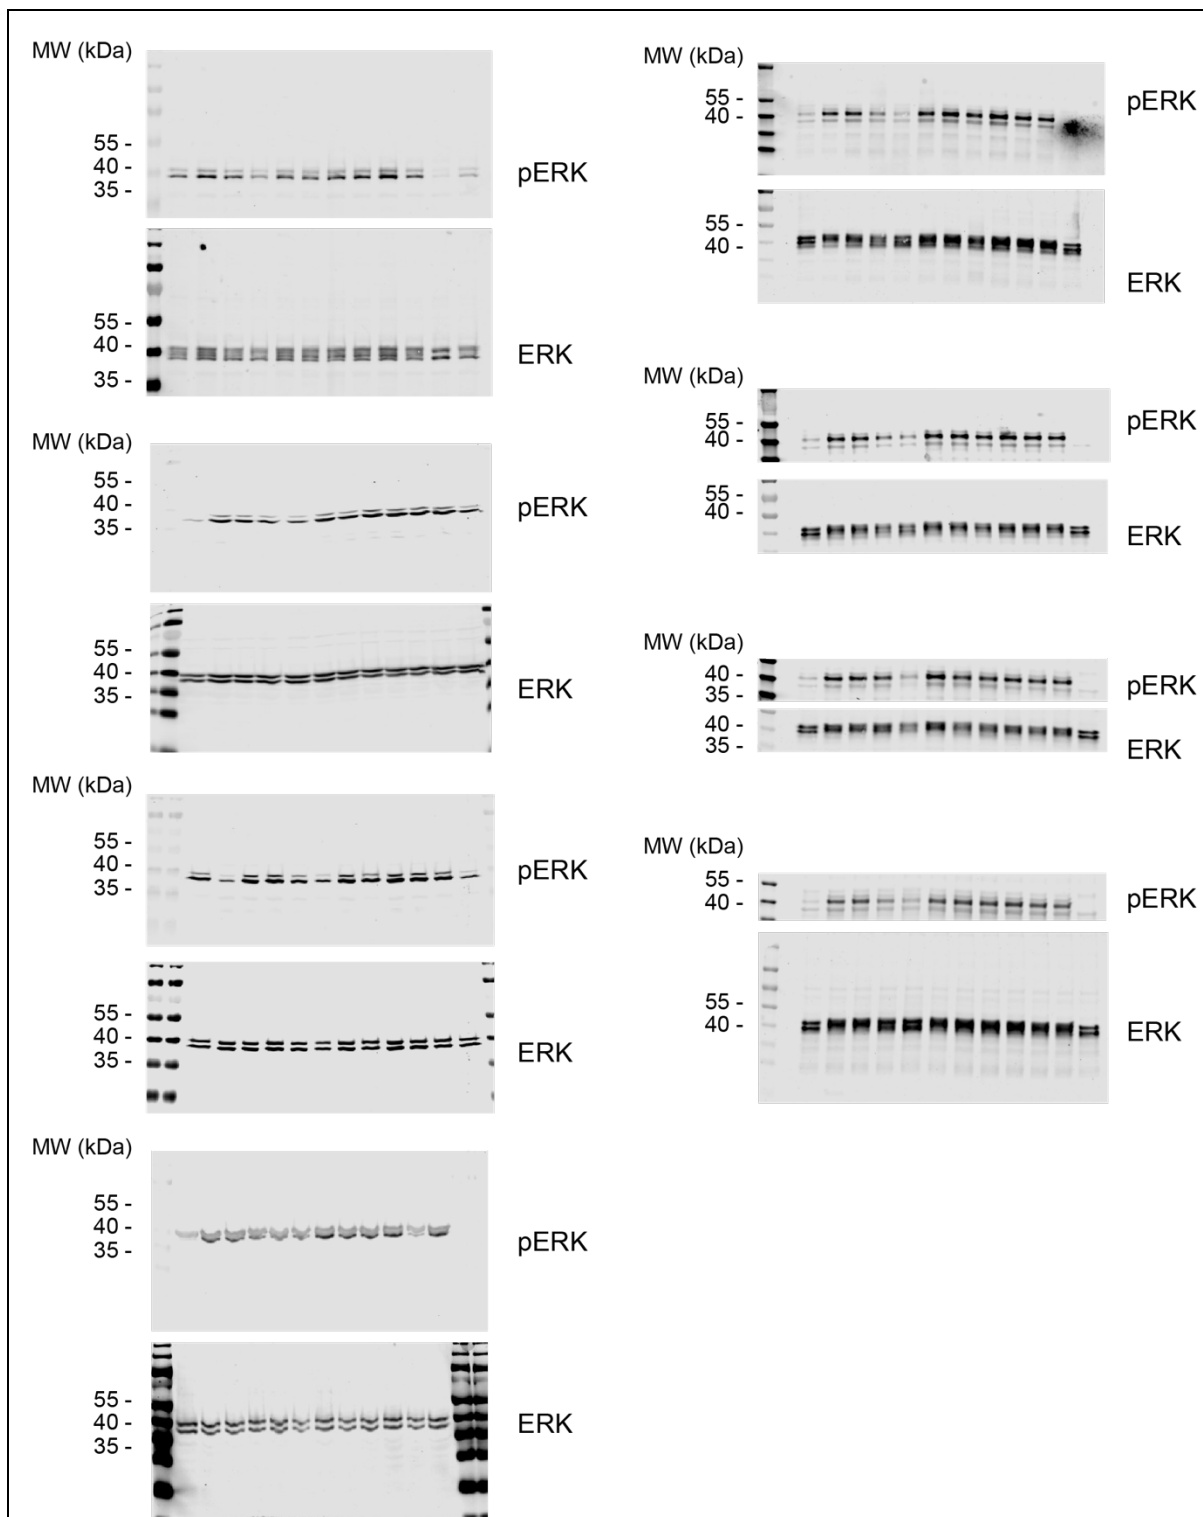

**Supplementary Figure 11. Original Western blotting data of Figure 5b.**

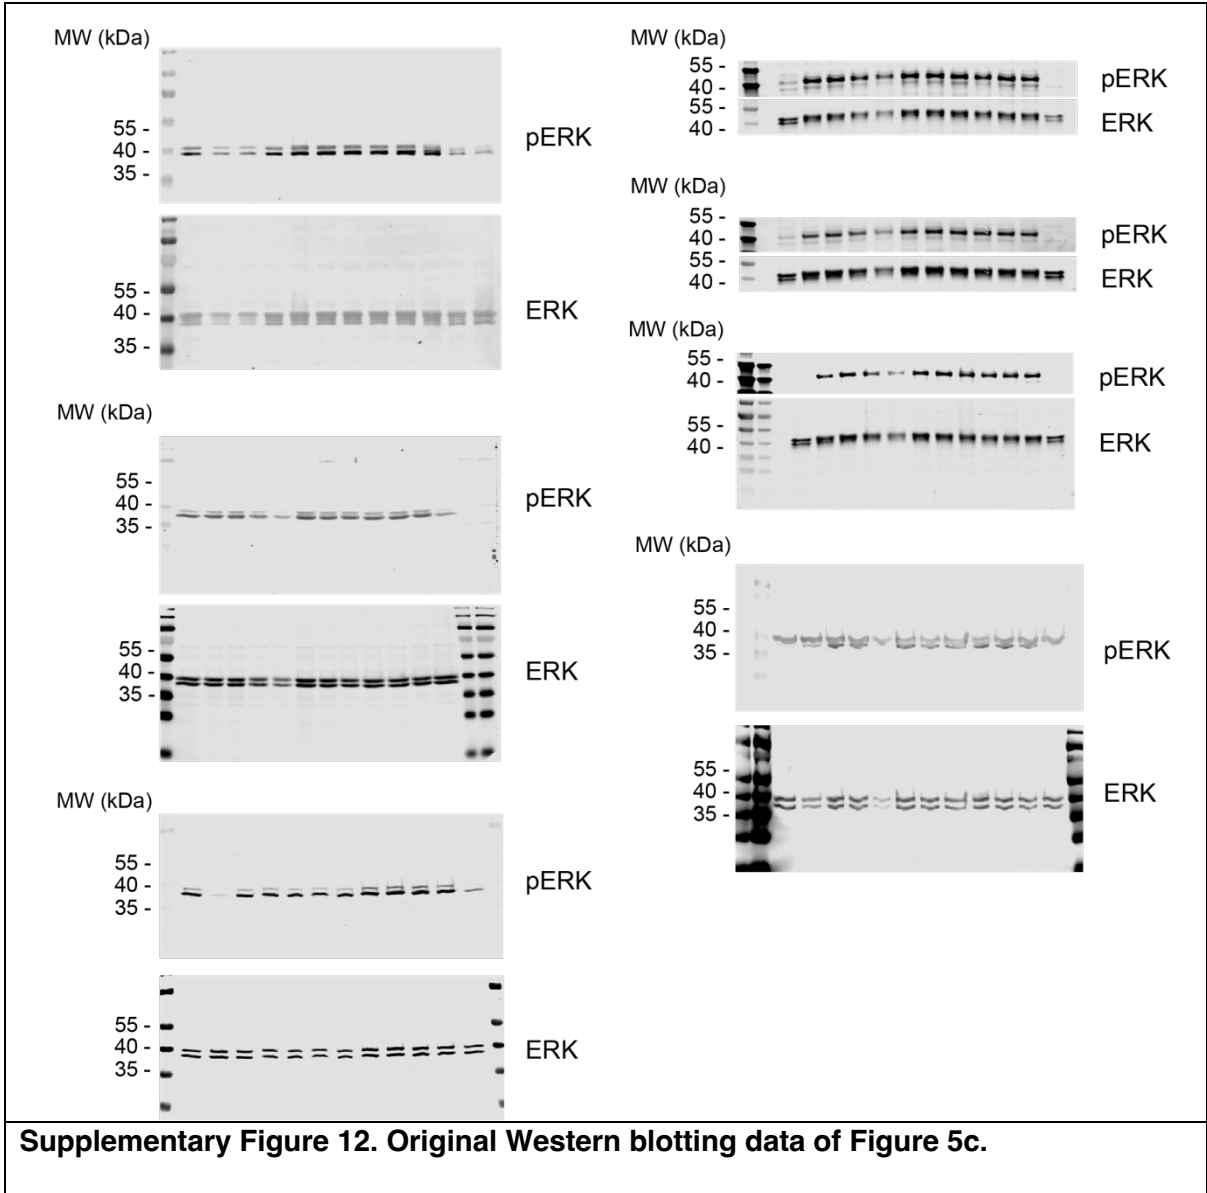

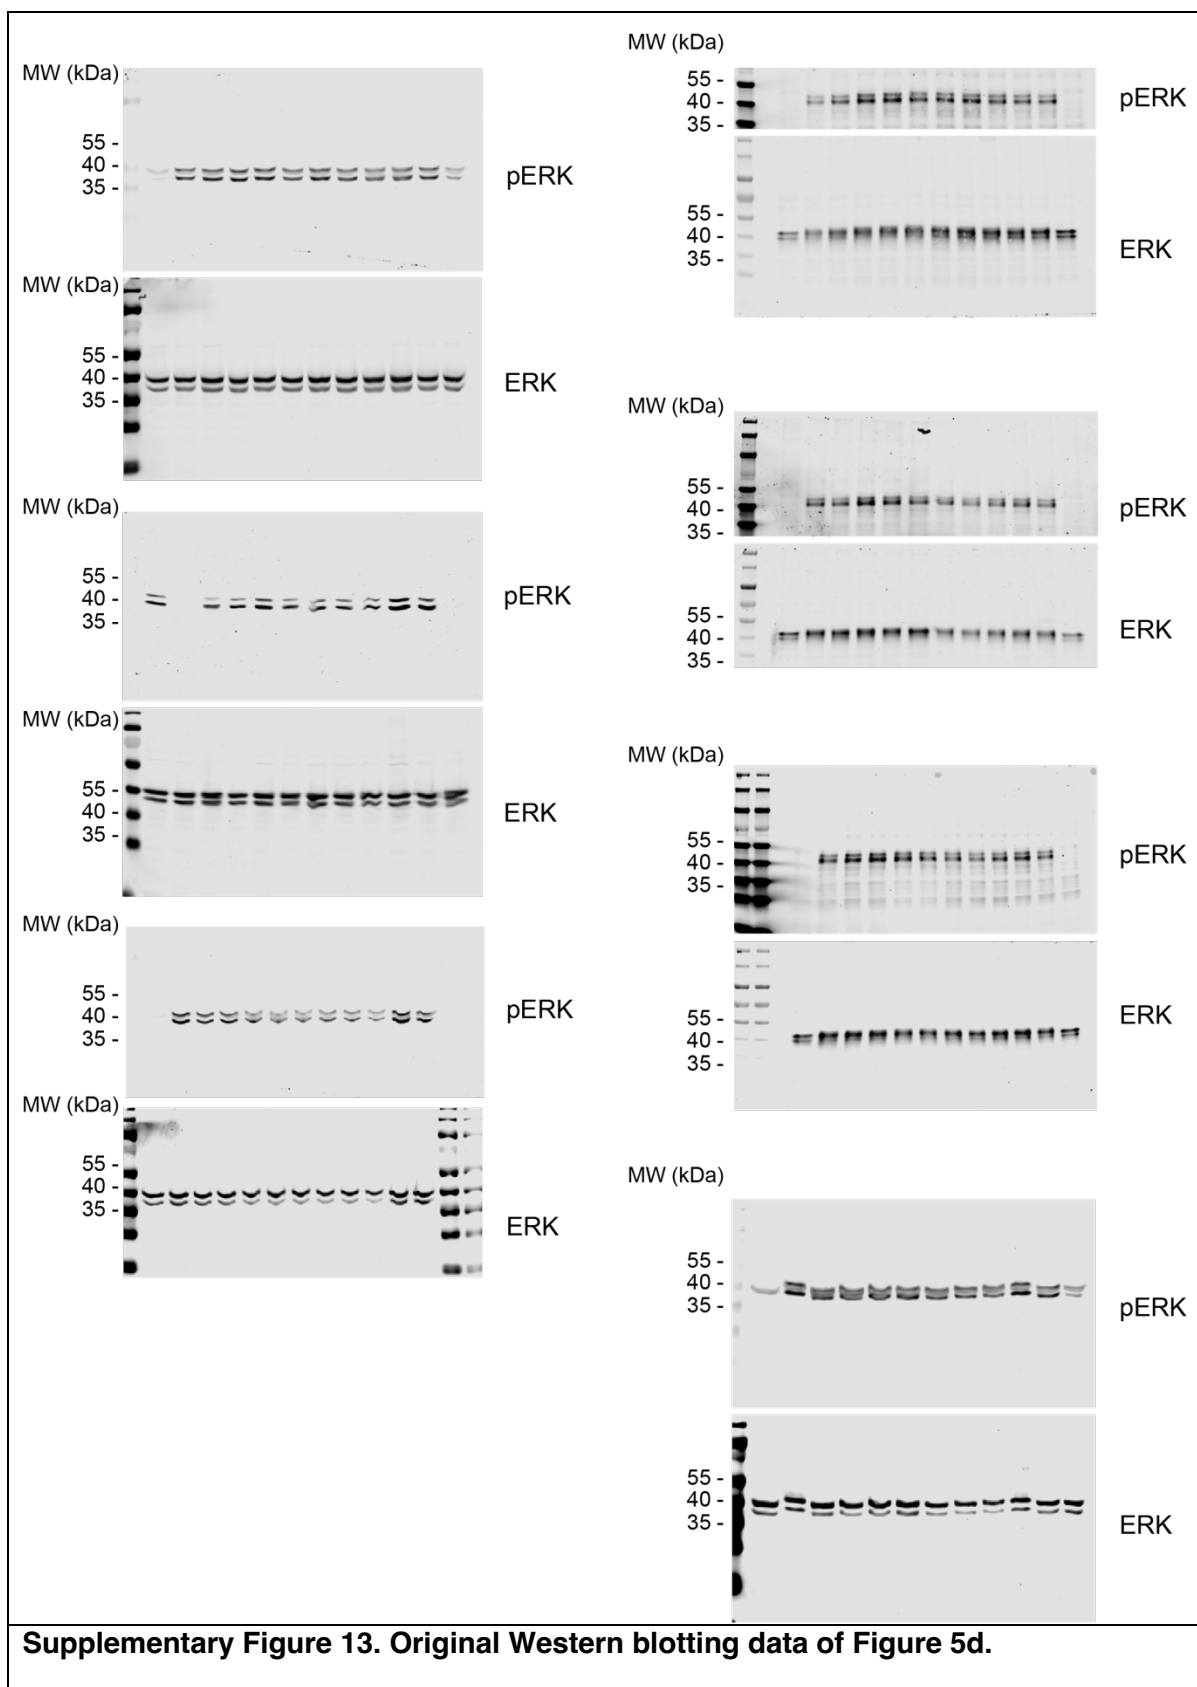

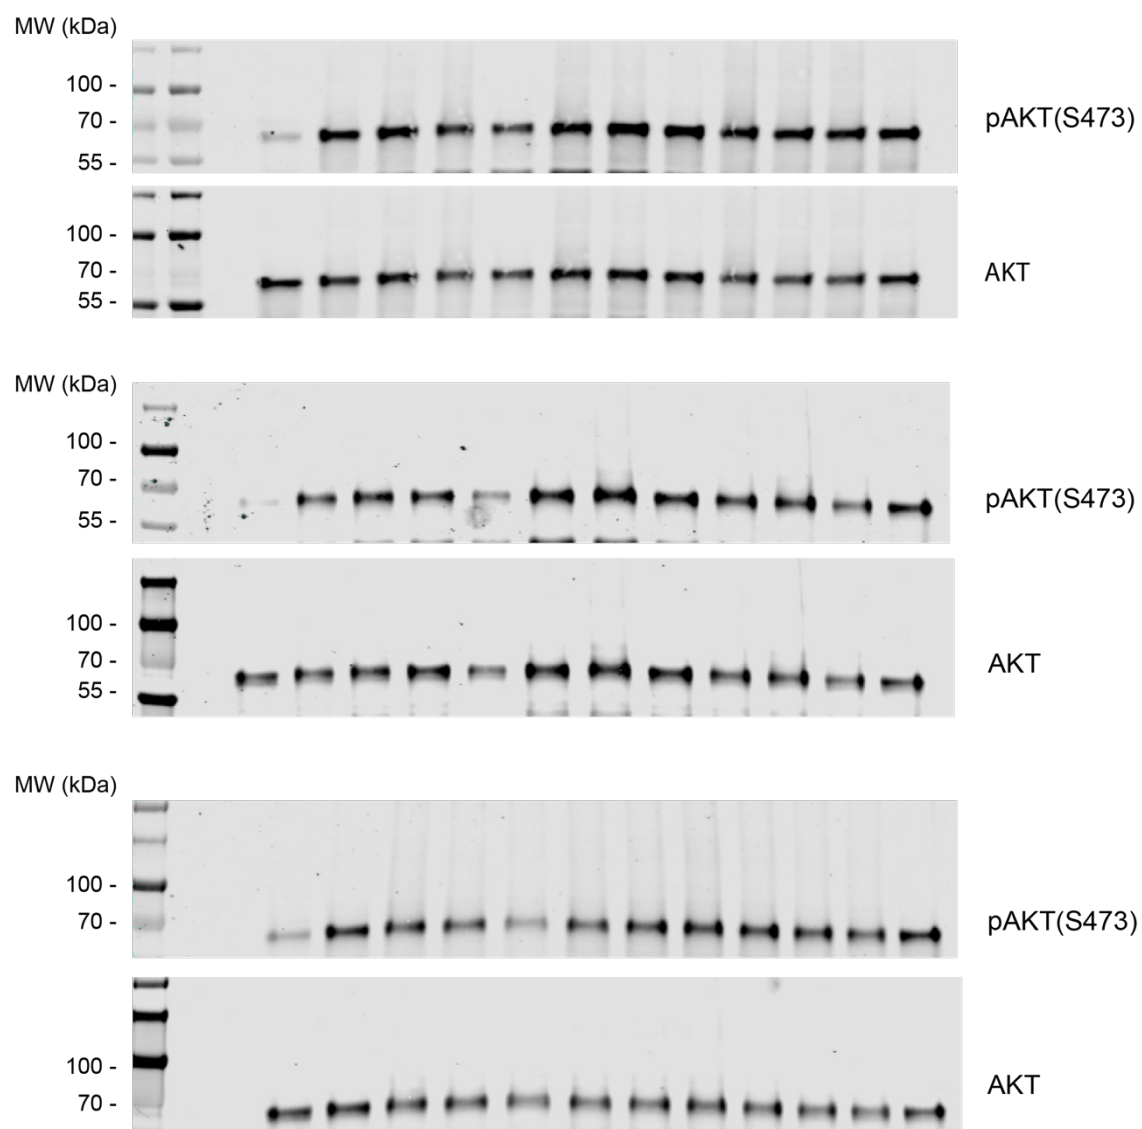

**Supplementary Figure 14. Original Western blotting data of Figure 5e.**

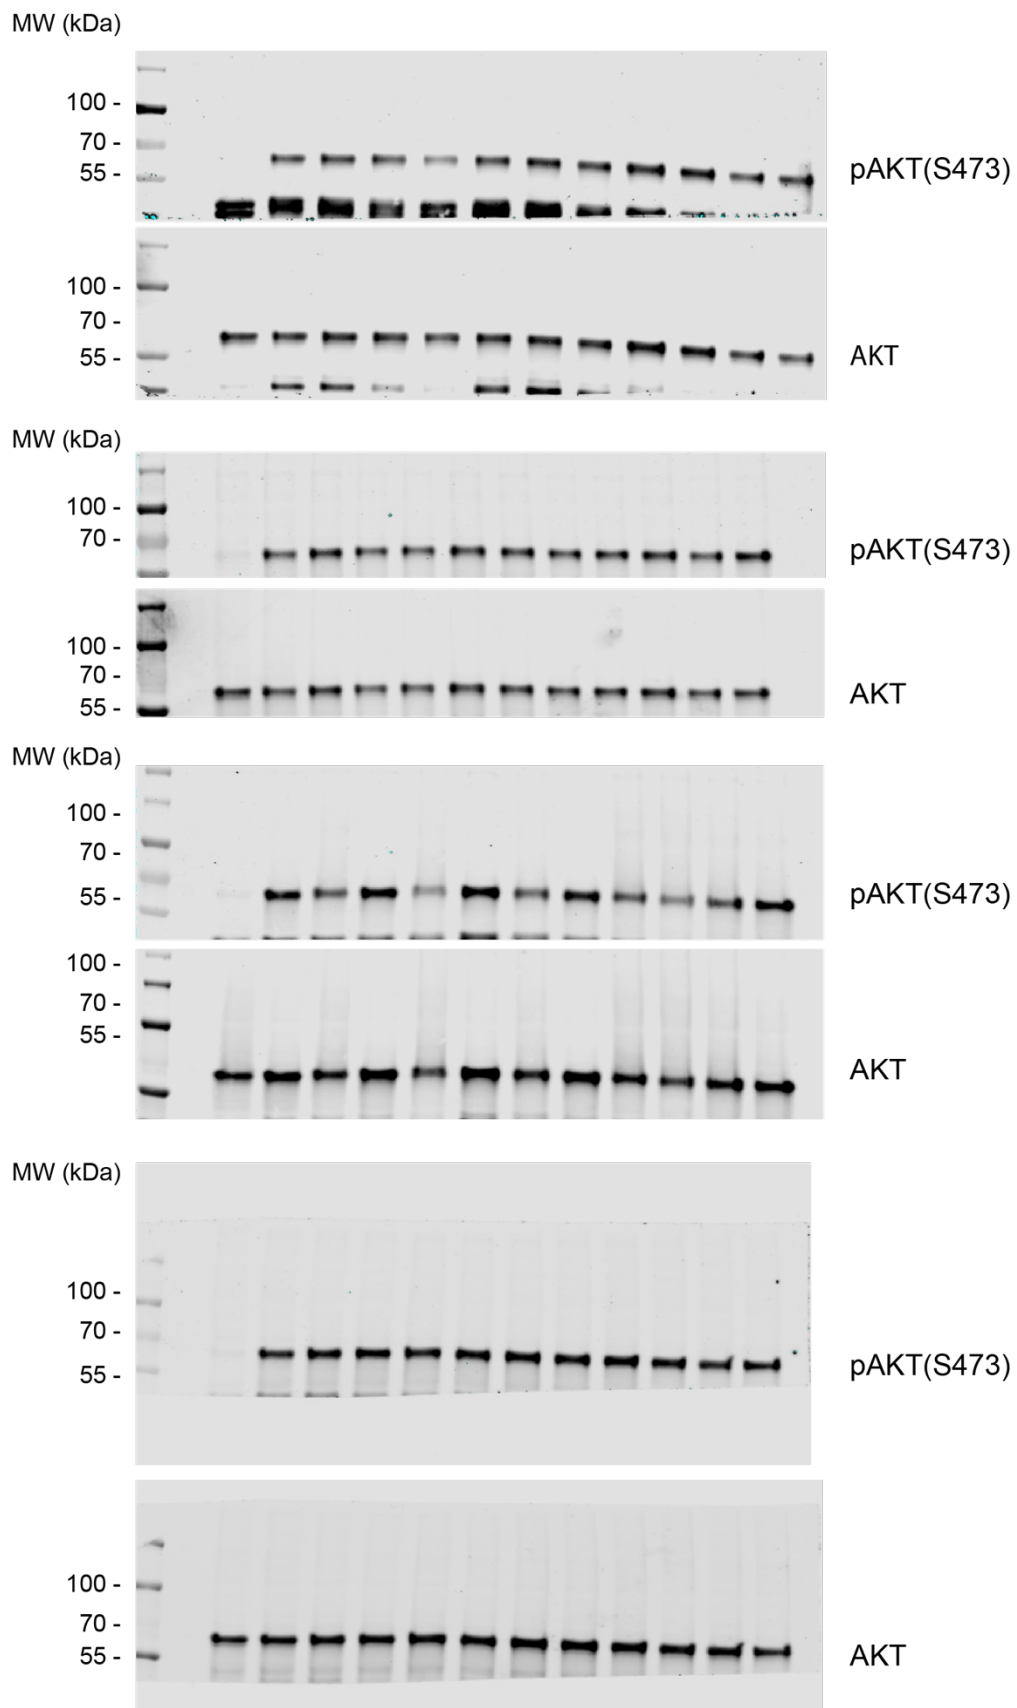

**Supplementary Figure 15. Original Western blotting data of Figure 5f.**

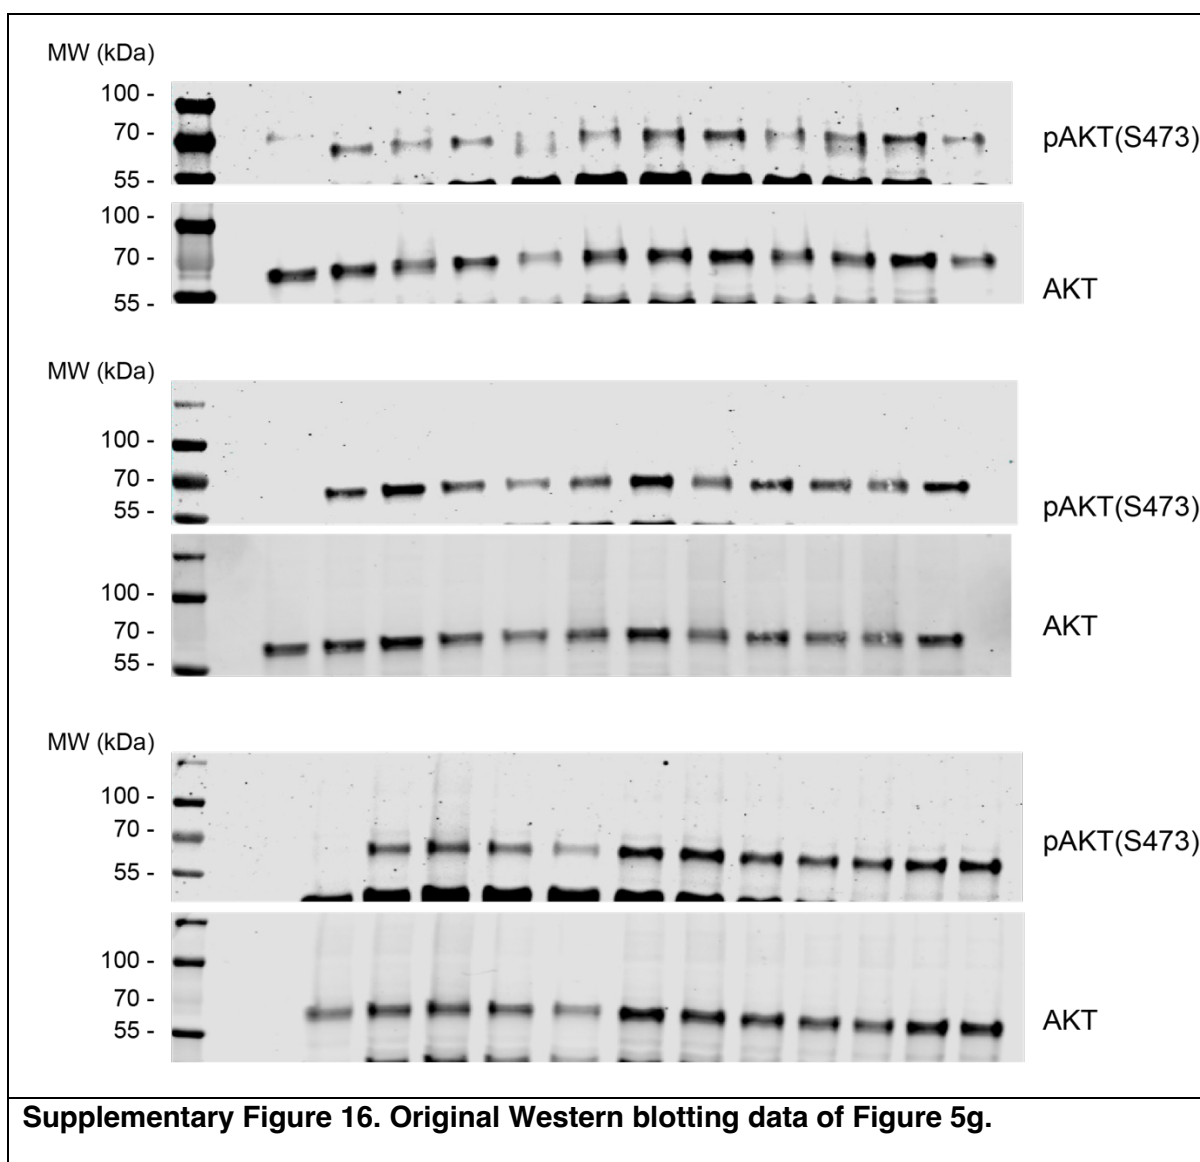

**Supplementary Figure 16. Original Western blotting data of Figure 5g.**

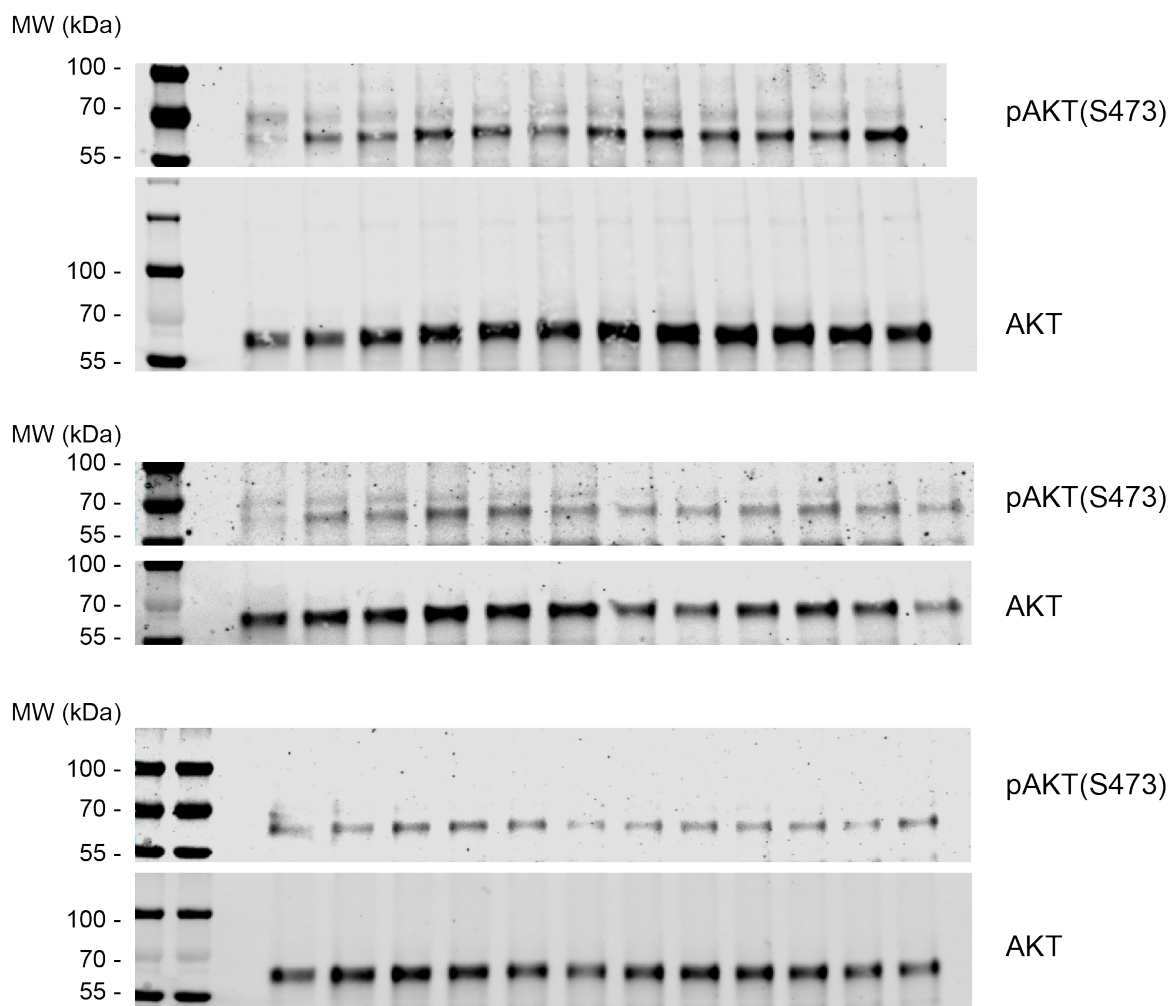

**Supplementary Figure 17. Original Western blotting data of Figure 5h.**

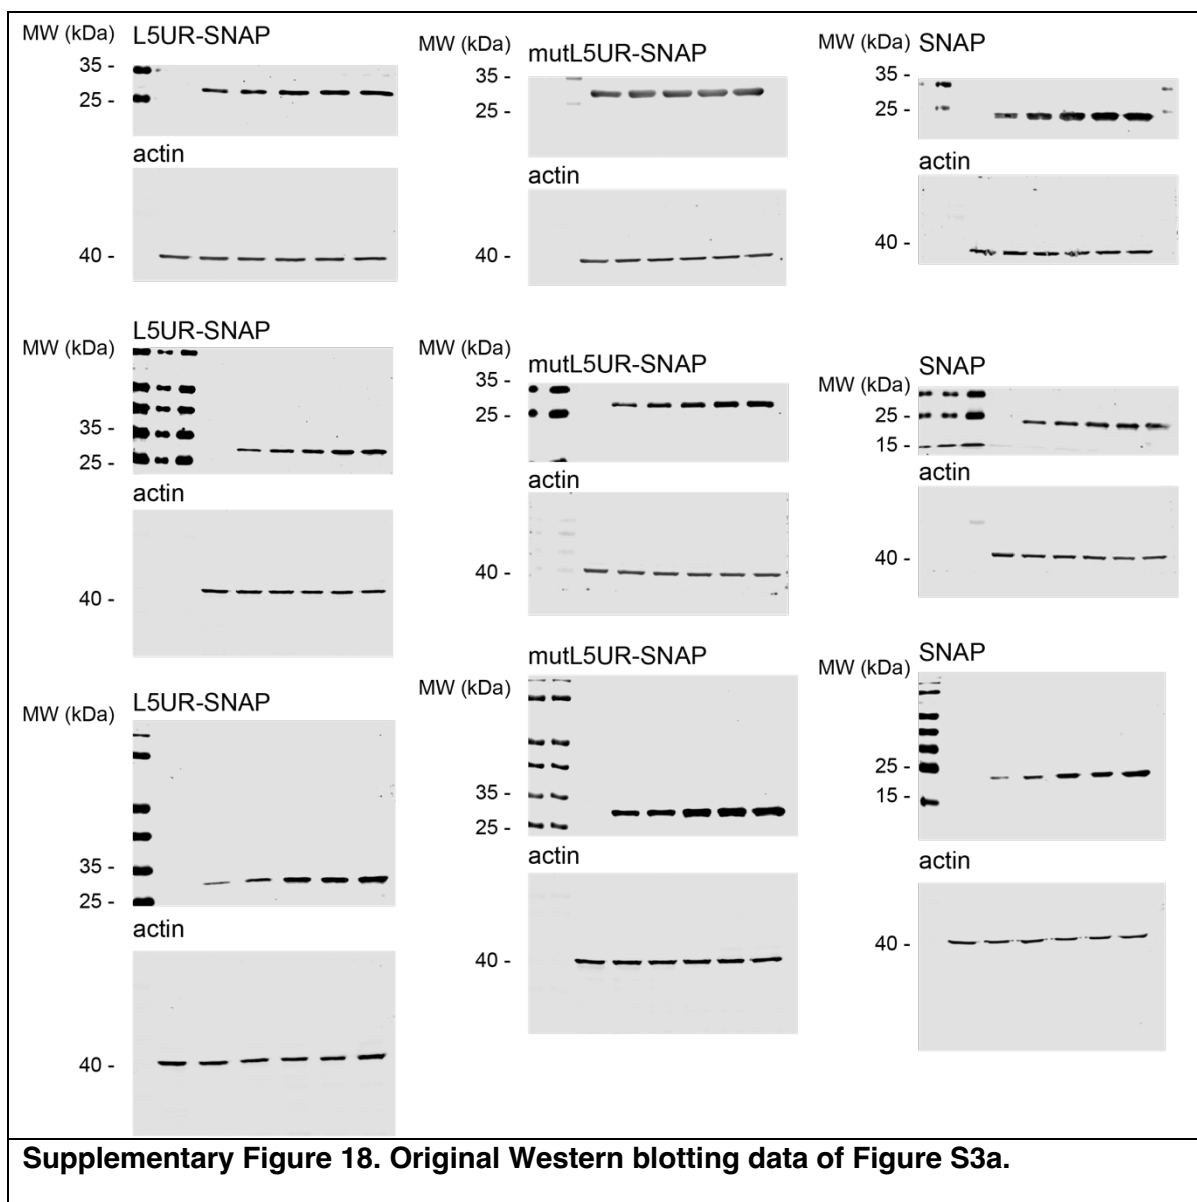



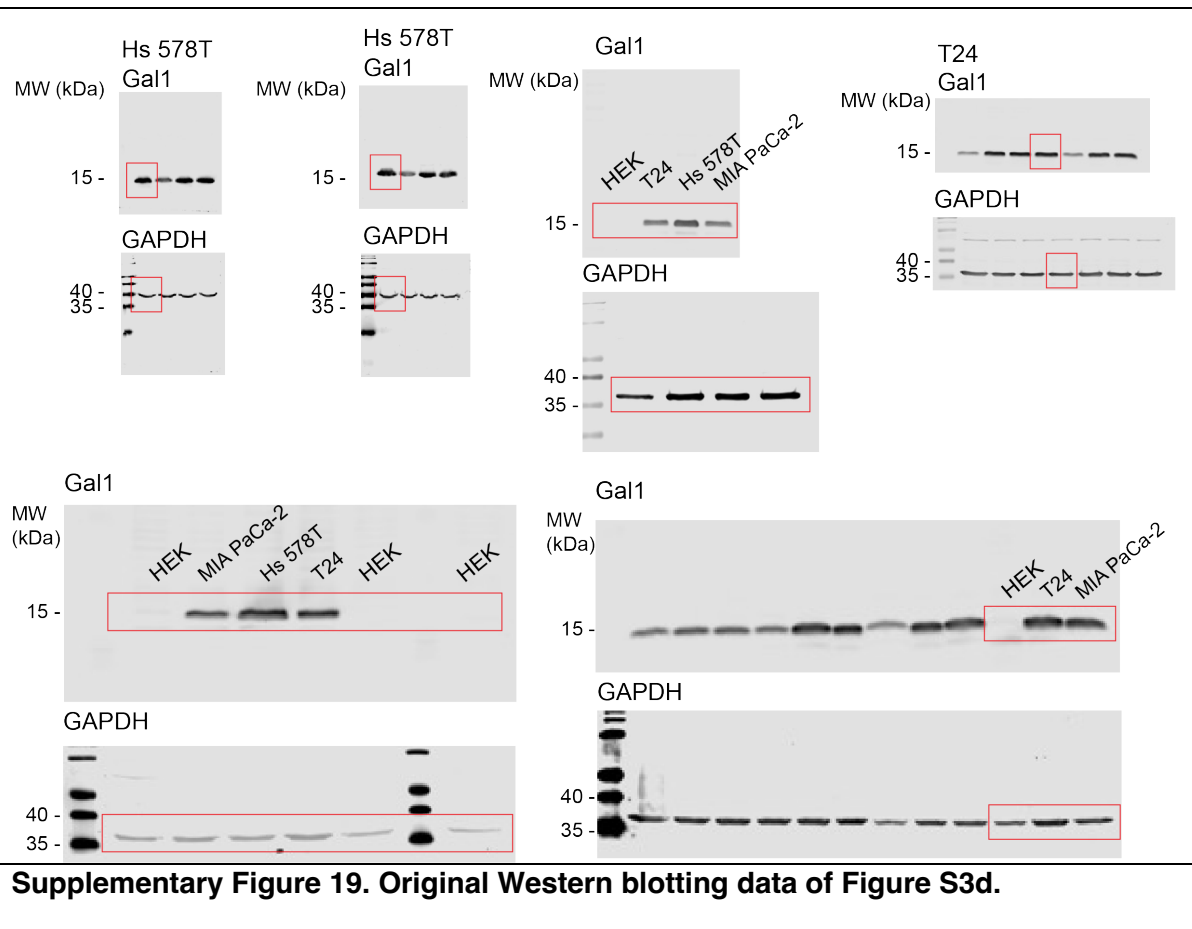

**Supplementary Table 1: Materials and equipment employed in the study.**

| REAGENT or RESOURCE                                                      | SOURCE                    | IDENTIFIER                     |
|--------------------------------------------------------------------------|---------------------------|--------------------------------|
| <b>Antibodies</b>                                                        |                           |                                |
| mouse monoclonal anti-Galectin 1 (E2)                                    | Santa Cruz Biotechnology  | sc-166619<br>RRID:AB_2136629   |
| mouse monoclonal Lambda 5 (A-1), $\lambda$ 5                             | Santa Cruz Biotechnology  | sc-398932<br>RRID: N/A         |
| rabbit polyclonal GST                                                    | Cell Signaling            | 2622S<br>RRID: N/A             |
| rabbit polyclonal anti-SNAP                                              | New England Biolabs       | P9310S<br>RRID:AB_10631145     |
| mouse monoclonal anti-B-Raf (F-7)                                        | Santa Cruz Biotechnology  | sc-5284<br>RRID:AB_626760      |
| rabbit polyclonal anti-C-Raf (C-12)                                      | Santa Cruz Biotechnology  | sc-133<br>RRID:AB_632305       |
| rabbit polyclonal anti-PI3K p110 $\alpha$                                | Cell Signaling            | 4255<br>RRID:AB_659888         |
| mouse monoclonal anti-RASSF7 (C-6)                                       | Santa Cruz Biotechnology  | sc-374431<br>RRID:AB_10989731  |
| rabbit polyclonal anti-RASSF9                                            | Invitrogen                | PA5-58878<br>RRID: N/A         |
| rabbit polyclonal anti-ASPP2                                             | Bethyl                    | A300-819A<br>RRID:AB_597858    |
| rabbit polyclonal anti-GAPDH                                             | Sigma-Aldrich             | G9545,<br>RRID:AB_796208       |
| mouse monoclonal anti- $\beta$ -actin                                    | Sigma-Aldrich             | A5441<br>RRID:AB_476744        |
| mouse monoclonal anti-phospho-p44/42 MAPK (Erk1/2) (Thr202/Tyr204) (E10) | Cell Signaling Technology | 9106<br>RRID:AB_331768         |
| rabbit polyclonal anti 44/42 MAPK (Erk1/2)                               | Cell Signaling Technology | 9102<br>RRID:AB_330744         |
| rabbit monoclonal anti-phospho-AKT(S473) (D9E)                           | Bioke                     | 4060S<br>RRID: N/A             |
| mouse monoclonal anti-AKT(pan) (40D4)                                    | Bioke                     | 2920S<br>RRID: N/A             |
| IRDye 680LT Goat anti-Mouse IgG1-Specific Secondary Antibody             | Li-Cor Biosciences        | 926-68052<br>RRID:AB_2783644   |
| IRDye 800CW Goat anti-Mouse IgG Secondary Antibody                       | Li-Cor Biosciences        | 926-32210<br>RRID:AB_621842    |
| IRDye 680RD Goat anti-Rabbit IgG Secondary Antibody                      | Li-Cor Biosciences        | 926-68071,<br>RRID:AB_10956166 |
| IRDye 800CW Goat anti-Rabbit IgG Secondary Antibody                      | LI-Cor Biosciences        | 926-32212,<br>RRID:AB_621847   |
| <b>Bacterial and virus strains</b>                                       |                           |                                |
| <i>E. coli</i> DH10B                                                     | New England Biolabs       | C3019I                         |
| <i>E. coli</i> BL21 Star (DE3)pLysS                                      | Thermo Fisher Scientific  | C602003                        |
| <b>Biological samples</b>                                                |                           |                                |
| N/A                                                                      | N/A                       | N/A                            |
| <b>Chemicals, peptides, and recombinant proteins</b>                     |                           |                                |
| Fluorescein-isothiocyanate labelled L5UR                                 | Pepmic Co., China         | N/A                            |
| L5UR                                                                     | Pepmic Co., China         | N/A                            |
| mutL5UR                                                                  | Pepmic Co., China         | N/A                            |

|                                                                                       |                             |                                                                       |
|---------------------------------------------------------------------------------------|-----------------------------|-----------------------------------------------------------------------|
| L5URcore                                                                              | Pepmic Co., China           | N/A                                                                   |
| Biotinylated L5UR                                                                     | This paper                  | N/A                                                                   |
| TAT-L5URcore                                                                          | This paper                  | N/A                                                                   |
| TAT-mutL5URcore                                                                       | This paper                  | N/A                                                                   |
| TAT                                                                                   | This paper                  | N/A                                                                   |
| Eu-L5URcore                                                                           | This paper                  | N/A                                                                   |
| Benzethonium chloride                                                                 | Sigma-Aldrich               | 53751-50G;<br>CAS121-54-0                                             |
| Trametinib                                                                            | MedChem Express             | SC-364639;<br>CAS871700-17-3                                          |
| Pierce Protease Inhibitor Mini Tablets, EDTA-free                                     | Thermo Scientific           | #A32955                                                               |
| PhosSTOP                                                                              | Roche                       | 04 906 837 001                                                        |
| Critical commercial assays                                                            |                             |                                                                       |
| Gateway LR Clonase II enzyme mix                                                      | Thermo Fisher Scientific    | 11791020                                                              |
| jetPRIME transfection reagent                                                         | Polyplus                    | 101000046                                                             |
| Coelenterazine 400a; 2,8-Dibenzyl-6-phenyl-imidazo[1,2a]pyrazin-3-(7H)-one; DeepBlueC | Gold Biotechnology          | C-320-1                                                               |
| Coelenterazine h                                                                      | Sanbio bv                   | 16894-1                                                               |
| alamarBlue cell viability reagent                                                     | Thermo Fisher Scientific    | DAL1100                                                               |
| SNAP-capture magnetic beads                                                           | New England Biolabs         | S9145S                                                                |
| Experimental models: Cell lines                                                       |                             |                                                                       |
| Human cell line, HEK293-EBNA (HEK)                                                    | Prof. Florian M. Wurm, EPFL | RRID:CVCL_6974                                                        |
| Human cell line, MIA PaCa-2                                                           | ATCC                        | CRM-CRL-1420,<br>RRID:CVCL_0428                                       |
| Human cell line, Hs 578T                                                              | DSMZ                        | ACC 781,<br>RRID:CVCL_0332                                            |
| Human cell line, T24                                                                  | DSMZ                        | ACC 376,<br>RRID:CVCL_0554                                            |
| BHK-21                                                                                | DSMZ                        | CCL-10,<br>RRID:CVCL_1914                                             |
| Experimental models: Organisms/strains                                                |                             |                                                                       |
| N/A                                                                                   |                             |                                                                       |
| Oligonucleotides                                                                      |                             |                                                                       |
| N/A                                                                                   |                             |                                                                       |
| Recombinant DNA                                                                       |                             |                                                                       |
| C413-E36_CMV promoter                                                                 | 3                           | Addgene, #162927                                                      |
| C453-E04_CMV promoter                                                                 | 3                           | Addgene, #162973                                                      |
| pDest-305                                                                             | 3                           | Addgene, #161895                                                      |
| pDest-312                                                                             | 3                           | Addgene, #161897                                                      |
| pDest-527                                                                             |                             | Addgene, #11518                                                       |
| C231-E13_RLuc8-stop                                                                   | 3                           | Addgene, FNL<br>Combinatorial<br>Cloning Platform, kit<br>#1000000211 |
| C511-E03_RLuc8-no stop                                                                | 3                           | Addgene, FNL<br>Combinatorial<br>Cloning Platform, kit<br>#1000000211 |
| pDONR235-GFP2_stop                                                                    | 4                           | N/A                                                                   |
| pDONR257-GFP2_no stop                                                                 | 4                           | N/A                                                                   |

|                                                         |                                            |                 |
|---------------------------------------------------------|--------------------------------------------|-----------------|
| Hs. K-Ras4B G12V (mutated P01116-2)                     | RAS mutant collection V2.0, RAS-Initiative | Addgene, #83132 |
| Hs. H-Ras G12V (mutated P01112-1)                       | RAS mutant collection V2.0, RAS-Initiative | Addgene, #83184 |
| Hs. ARAF (P10398)                                       | RAS mutant collection V2.0, RAS-Initiative | Addgene, #70293 |
| Hs. BRAF (P15056)                                       | RAS mutant collection V2.0, RAS-Initiative | Addgene, #70299 |
| Hs. RAF1 (P04049)                                       | RAS mutant collection V2.0, RAS-Initiative | Addgene, #70497 |
| pDONR221-hGal1 (P09382)                                 | This paper                                 | N/A             |
| pDONR221-hNGal1 (mutated P09382)                        | This paper                                 | N/A             |
| pDONR221-C-RBD (P04049)                                 | GeneCust (Boynes, France)                  | N/A             |
| pDONR221-B-RBD (aa 155-227 of P15056)                   | GeneCust (Boynes, France)                  | N/A             |
| pDest305-CMV-GFP2- K-Ras4BG12V (mutated P01116-2)       | 4                                          | N/A             |
| pDest305-CMV-RLuc8- K-Ras4BG12V (mutated P01116-2)      | 4                                          | N/A             |
| pDest305-CMV-GFP2- H-RasG12V (mutated P01112-1)         | 4                                          | N/A             |
| pDest305-CMV-RLuc8- H-RasG12V (mutated P01112-1)        | 4                                          | N/A             |
| pDest305-CMV-hGal1 (P09382)                             | This paper                                 | N/A             |
| pDest305-CMV-RLuc8-Gal1 (P09382)                        | This paper                                 | N/A             |
| pDest305-CMV-GFP2-Gal1 (P09382)                         | This paper                                 | N/A             |
| pDest305-CMV-RLuc8-N-hGal1 (mutated P09382)             | This paper                                 | N/A             |
| pDest305-CMV-GFP2-N-hGal1 (mutated P09382)              | This paper                                 | N/A             |
| pEF-A-RBD-GFP2 (aa 19-91 of P10398)                     | This paper                                 | N/A             |
| pEF-B-RBD-GFP2 (aa 155-227 of P15056)                   | This paper                                 | N/A             |
| pEF-C-RBD-GFP2 (aa 56-131 of P04049)                    | This paper                                 | N/A             |
| pClontech-C-L5UR (P15814-1)                             | This paper                                 | N/A             |
| pEF-L5UR-SNAP (aa 38-89 of P15814-1)                    | GeneCust (Boynes, France)                  | N/A             |
| pEF-mutL5UR-SNAP (mutated aa 38-89 of P15814-1)         | GeneCust (Boynes, France)                  | N/A             |
| pEF-SNAP                                                | GeneCust (Boynes, France)                  | N/A             |
| pDest305-CMV-GFP2-B-Raf (P15056)                        | This paper                                 | N/A             |
| pDest305-CMV-GFP2-C-Raf (P04049)                        | This paper                                 | N/A             |
| pDest305-CMV-GFP2-A-Raf (P10398)                        | This paper                                 | N/A             |
| pEF-A-RBD-D75A-GFP2 (mutated aa 19-91 of P10398)        | This paper                                 | N/A             |
| pEF-B-RBD-D211,213A-GFP2 (mutated aa 155-227 of P15056) | This paper                                 | N/A             |
| mGFP-rtGal1 (P11762)                                    | 1                                          | N/A             |
| mRFP-C-RBD (aa 56-131 of P04049)                        | 5                                          | N/A             |

|                                                       |                                     |                                                                                                                                                                                                                           |
|-------------------------------------------------------|-------------------------------------|---------------------------------------------------------------------------------------------------------------------------------------------------------------------------------------------------------------------------|
| mGFP-H-RasG12V (mutated P01112-1)                     | 6                                   | N/A                                                                                                                                                                                                                       |
| mCherry-H-RasG12V (mutated P01112-1)                  | 7                                   | N/A                                                                                                                                                                                                                       |
| mRFP-C-RBD-D117A<br>(mutated, aa 56-131 of P04049)    | 1                                   | N/A                                                                                                                                                                                                                       |
| pcDNA3-rtGal1 (P11762)                                | 8                                   | N/A                                                                                                                                                                                                                       |
| pcDNA3-N-rtGal-1 (mutated P11762)                     | 1                                   | N/A                                                                                                                                                                                                                       |
| pcDNA-Hygro-Anginex                                   | 9, 10                               | N/A                                                                                                                                                                                                                       |
| pDest527-His-hGal1<br>( P09382)                       | This paper                          | N/A                                                                                                                                                                                                                       |
| pGEX4T2-B-RBD<br>(aa 155-227 of P15056)               | This paper                          | N/A                                                                                                                                                                                                                       |
| pGEX2T-C-RBD (aa 50-134 of P04049)                    | This paper                          | N/A                                                                                                                                                                                                                       |
| pGEX4T2                                               | Addgene                             | 27458101                                                                                                                                                                                                                  |
| pcDNA3.1(-)                                           | ThermoFisher Scientific             | V79520                                                                                                                                                                                                                    |
| pDest305-CMV-mNeonGreen- H-RasG12V (mutated P01112-1) | This paper                          | N/A                                                                                                                                                                                                                       |
| pDest305-CMV-NanoLuc- H-RasG12V (mutated P01112-1)    | This paper                          | N/A                                                                                                                                                                                                                       |
| pcDNA3-RLucF1-BRAF-RLucF2                             | 11                                  | N/A                                                                                                                                                                                                                       |
| Software and algorithms                               |                                     |                                                                                                                                                                                                                           |
| BREEZE pipeline                                       | 12                                  | <a href="https://breeze.fimm.fi/">https://breeze.fimm.fi/</a>                                                                                                                                                             |
| PyMol                                                 | The PyMOL Molecular Graphics System | <a href="https://pymol.org/2/">https://pymol.org/2/</a>                                                                                                                                                                   |
| GraphPad Prism v9.5.1                                 | GraphPad by Dotmatics,              | <a href="https://www.graphpad.com/">https://www.graphpad.com/</a>                                                                                                                                                         |
| Other                                                 |                                     |                                                                                                                                                                                                                           |
| CLARIOstar Plus Microplate Reader                     | BMG LABTECH                         | <a href="https://www.bmglabtech.com/en/clariostar-plus/">https://www.bmglabtech.com/en/clariostar-plus/</a>                                                                                                               |
| Odyssey CLx Infrared Imaging System                   | LI-COR Biosciences                  | <a href="https://www.licor.com/bio/odyssey-clx/">https://www.licor.com/bio/odyssey-clx/</a>                                                                                                                               |
| ÄKTA pure chromatography system                       | Cytiva                              | <a href="https://www.cytivalifesciences.com/en/us/shop/chromatography/chromatography-systems/akta-pure-p-05844">https://www.cytivalifesciences.com/en/us/shop/chromatography/chromatography-systems/akta-pure-p-05844</a> |
| Elmasonic S 40 H                                      | Elma                                | <a href="https://www.elma-ultrasonic.com/">https://www.elma-ultrasonic.com/</a>                                                                                                                                           |
| Tecan Spark multimode microplate reader               | Tecan Austria GmbH                  | <a href="https://lifesciences.tecan.com/multimode-plate-reader">https://lifesciences.tecan.com/multimode-plate-reader</a>                                                                                                 |
| Electron microscope                                   | JEOL                                | JEOL JEM-1400                                                                                                                                                                                                             |

|                                            |                      |                                                                                                                                                                                                                                                                                                     |
|--------------------------------------------|----------------------|-----------------------------------------------------------------------------------------------------------------------------------------------------------------------------------------------------------------------------------------------------------------------------------------------------|
| Inverted microscope AXIO Observer D1       | Zeiss                | <a href="https://www.zeiss.com/microscopy/en/products/light-microscopes/widefield-microscopes/axio-observer-for-life-science-research.html#features">https://www.zeiss.com/microscopy/en/products/light-microscopes/widefield-microscopes/axio-observer-for-life-science-research.html#features</a> |
| Lambert Instruments FLIM Attachment (LIFA) | Lambert Instruments  | <a href="https://www.lambertinstruments.com/lifa#lifa-introduction">https://www.lambertinstruments.com/lifa#lifa-introduction</a>                                                                                                                                                                   |
| LM10 Microfluidizer Processor              | (Microfluidics, USA) | <a href="https://www.microfluidics-mpt.com/microfluidizers/lm10">https://www.microfluidics-mpt.com/microfluidizers/lm10</a>                                                                                                                                                                         |

**Supplementary Table 2:** Sequences, N-terminal modifications, calculated and found m/z values of synthesized peptides. All the peptides bear a C-terminal amide. (Ac: Acetylated)

| Peptide                      | Sequence                                                         | N-term.           | Purity / % | m/z calc.       | m/z found                                                 |
|------------------------------|------------------------------------------------------------------|-------------------|------------|-----------------|-----------------------------------------------------------|
| L5UR                         | LLRPTAASQSRALGPGAP<br>GGSSRSSLRSRWGRFLL<br>QRGSWTGPRCWPRGFQ<br>S | Ac<br>Biotin-PEG5 | 90<br>>95  | 949.8<br>1234.6 | 950.2 [M+6H] <sup>+6</sup><br>1235.4 [M+5H] <sup>+5</sup> |
| L5URcore                     | SRSSLRSRWGRFLLQRG<br>SWGPR                                       | Ac                | >95        | 929.8           | 930.2 [M+3H] <sup>+3</sup>                                |
| L5URcore-nK                  | KSRSSLRSRWGRFLLQR<br>GSWTGPR                                     | Ac                | >95        | 1458.1          | 1458.2 [M+2H] <sup>+2</sup>                               |
| mutL5UR<br>core              | SRSSDEEEGGRESLQRG<br>SWGPR                                       | Ac                | >95        | 868.7           | 869.0 [M+3H] <sup>+3</sup>                                |
| TAT                          | GRKKRRQRRRPQ                                                     | Ac                | >95        | 555.0           | 555.1 [M+3H] <sup>+3</sup>                                |
| TAT-PEG2-<br>L5URcore        | GRKKRRQRRRPQ-PEG2-<br>SRSSLRSRWGRFLLQRG<br>SWGPR                 | Ac                | >95        | 648.8           | 649.1 [M+7H] <sup>+7</sup>                                |
| TAT-PEG2-<br>mutL5UR<br>core | GRKKRRQRRRPQ-PEG2-<br>SRSSDEEEGGRESLQRG<br>SWGPR                 | Ac                | >95        | 1088.8          | 1089.3 [M+4H] <sup>+4</sup>                               |

### Supplementary Information References

1. Blazevits O, *et al.* Galectin-1 dimers can scaffold Raf-effectors to increase H-ras nanoclustering. *Sci Rep* **6**, 24165 (2016).
2. Elantak L, *et al.* Structural basis for galectin-1-dependent pre-B cell receptor (pre-BCR) activation. *J Biol Chem* **287**, 44703-44713 (2012).
3. Wall VE, Garvey LA, Mehalko JL, Procter LV, Esposito D. Combinatorial assembly of clone libraries using site-specific recombination. *Methods Mol Biol* **1116**, 193-208 (2014).
4. Okutachi S, *et al.* A Covalent Calmodulin Inhibitor as a Tool to Study Cellular Mechanisms of K-Ras-Driven Stemness. *Front Cell Dev Biol* **9**, 665673 (2021).
5. Abankwa D, Gorfe AA, Inder K, Hancock JF. Ras membrane orientation and nanodomain localization generate isoform diversity. *Proc Natl Acad Sci U S A* **107**, 1130-1135 (2010).
6. Abankwa D, *et al.* A novel switch region regulates H-ras membrane orientation and signal output. *EMBO J* **27**, 727-735 (2008).
7. Solman M, *et al.* Specific cancer-associated mutations in the switch III region of Ras increase tumorigenicity by nanocluster augmentation. *Elife* **4**, e08905 (2015).
8. Paz A, Haklai R, Elad-Sfadia G, Ballan E, Kloog Y. Galectin-1 binds oncogenic H-Ras to mediate Ras membrane anchorage and cell transformation. *Oncogene* **20**, 7486-7493 (2001).
9. Thijssen VL, *et al.* Galectin-1 is essential in tumor angiogenesis and is a target for antiangiogenesis therapy. *Proc Natl Acad Sci U S A* **103**, 15975-15980 (2006).
10. Brandwijk RJ, Dings RP, van der Linden E, Mayo KH, Thijssen VL, Griffioen AW. Anti-angiogenesis and anti-tumor activity of recombinant anginex. *Biochem Biophys Res Commun* **349**, 1073-1078 (2006).
11. Rock R, *et al.* BRAF inhibitors promote intermediate BRAF(V600E) conformations and binary interactions with activated RAS. *Sci Adv* **5**, eaav8463 (2019).
12. Potdar S, *et al.* Breeze 2.0: an interactive web-tool for visual analysis and comparison of drug response data. *Nucleic Acids Res*, (2023).
